# Supplementary material for: A composite of pineapple leaf-derived porous carbon integrated with ZnCo-MOF for high-performance supercapacitors
Source: Royal Society of Chemistry journal article supplement (doi:10.1039/d4cp02882a), 2024-01-01
Supplement: d4cp02882a1.pdf [file d4cp02882a1.pdf]

## Supplementary Information

### **Composite of Pineapple leaf-derived porous carbon integrated with ZnCo-MOF for high-performance supercapacitor**

Xiaoxiao Ma<sup>a</sup>, Yunfan Bai<sup>a</sup>, Shuangli Chen<sup>a</sup>, Zhixian He<sup>b</sup>, Pingping Wu<sup>a</sup>, Yabing Qi<sup>a</sup>  
and Sijing Zhang<sup>a\*</sup>

<sup>a</sup>School of Chemistry and Chemical Engineering, Xi'an University of Architecture and  
Technology, Xi'an, 710055, China

<sup>b</sup>Instrumental Analysis Center, Xi'an University of Architecture and Technology, Xi'an,  
710055, China

The electrochemical performance of the composites is closely related to the preparation conditions. The preparation conditions of the molar ratio of Zn<sup>2+</sup> to Co<sup>2+</sup>, the amount of PLB added, and the carbonization temperature were thus optimized accordingly.

Masses of 1.1891 g, 0.5946 g, 0.2971 g, 0.2971 g, and 0.2971 g (corresponding to 4 mmol, 2 mmol, 1 mmol, 1 mmol, and 1 mmol) of Zn(NO<sub>3</sub>)<sub>2</sub>·6H<sub>2</sub>O, and masses of 0.2910 g, 0.2910 g, 0.5822 g, and 1.1641 g (corresponding to 1 mmol, 1 mmol, 1 mmol, 2 mmol, and 4 mmol) of Co(NO<sub>3</sub>)<sub>2</sub>·6H<sub>2</sub>O, were separately weighed. These quantities correspond to Zn<sup>2+</sup> to Co<sup>2+</sup> molar ratios of 4:1, 2:1, 1:1, 1:2, and 1:4. Additionally, five

---

\*Authors to whom correspondence should be addressed.

Add: 13 Yanta Rd., Xi'an, 710055, China; E-mail: [sijingzhang@xauat.edu.cn](mailto:sijingzhang@xauat.edu.cn)

18 portions of 0.1000 g of PLB were weighed., and the materials were added to 40 mL of  
 19 methanol. Following the method described in Section 2.2, a series of composite materials  
 20 were prepared at a carbonization temperature of 800°C to investigate the effect of the  
 21  $\text{Zn}^{2+}/\text{Co}^{2+}$  ratio on the electrochemical performance of the electrode materials.

## 22 1 Optimization of the molar ratio of $\text{Zn}^{2+}$ to $\text{Co}^{2+}$

23 The influence of the molar ratio of  $\text{Zn}^{2+}$  to  $\text{Co}^{2+}$  on the electrochemical performances  
 24 (CV, CP, EIS, and specific capacitance) of the electrode are shown in Fig. S1.

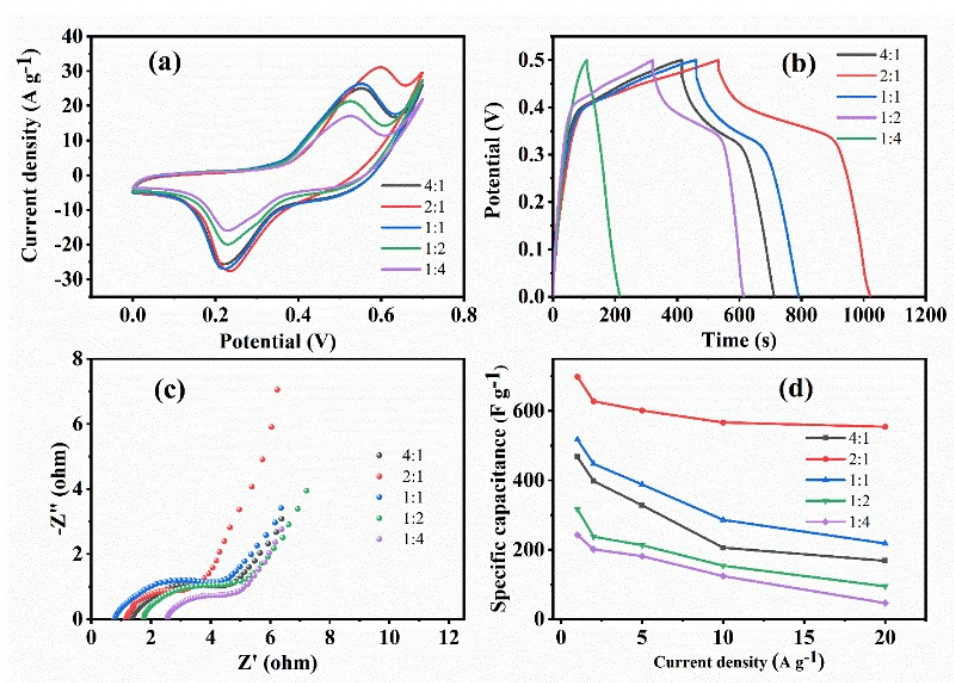

25 **Fig. S1** Electrochemical performance of WBPC with different mass ratios of  $\text{Zn}^{2+}$  to  $\text{Co}^{2+}$ :  
 26 (a) CV curve; (b) GCD curve (c) EIS curve; (d) Specific capacitance diagram

28 As shown in Fig. S1a, at the same scanning rate ( $20 \text{ mV s}^{-1}$ ), redox peaks are clearly  
 29 observed in the CV curves with different molar ratios, indicating that all five electrodes  
 30 exhibit Faradaic behavior. As the molar ratio of  $\text{Zn}^{2+}$  to  $\text{Co}^{2+}$  gradually increases, the curve  
 31 area of the electrode first increases and then decreases. It is evident that the CV curve area is  
 32 largest when the molar ratio of  $\text{Zn}^{2+}$  to  $\text{Co}^{2+}$  is 2:1, indicating superior capacitive performance.

33 This may be due to the optimal molar ratio of  $\text{Zn}^{2+}$  to  $\text{Co}^{2+}$  providing active sites, thereby  
34 enhancing the chemical reaction behavior. Fig. S1b shows the GCD curves of electrodes with  
35 different molar ratios at a current density of  $1 \text{ A g}^{-1}$ . Under the same current density, the GCD  
36 curves exhibit approximately symmetrical behavior. When the molar ratio of  $\text{Zn}^{2+}$  to  $\text{Co}^{2+}$  is  
37 2:1, the curve shows the longest discharge time, with clear symmetry and an extended charge-  
38 discharge platform, indicating excellent capacitive performance. As shown in Fig. S1c, the  
39 EIS spectrum indicates that, in the high-frequency region, the small semicircle radius  
40 indicates that electrode material with a  $\text{Zn}^{2+}$  to  $\text{Co}^{2+}$  molar ratio of 2:1 exhibits a smaller  
41 internal resistance. This suggests that the charge transfer speed of the electrode material is  
42 faster and its charge transfer capability is stronger. Additionally, in the low-frequency region,  
43 the EIS plot for the electrode material with a 2:1 molar ratio of  $\text{Zn}^{2+}$  to  $\text{Co}^{2+}$  shows a steeper  
44 slope, indicating lower ion diffusion resistance in the electrolyte and better diffusion effect.  
45 According to the GCD curve, the specific capacitance calculations for electrode materials  
46 with different molar ratios are shown in Fig. S1d. It is evident that, at a current density of  $1\text{-}20$   
47  $\text{A g}^{-1}$ , the electrode material consistently exhibits higher specific capacitance (up to  $698.5 \text{ F g}^{-1}$ )  
48 at a  $\text{Zn}^{2+}$  to  $\text{Co}^{2+}$  molar ratio of 2:1 compared to other materials. This suggests that this  
49 material undergoes more complete redox reactions, possesses more electroactive sites, and  
50 allows for easier electrolyte diffusion, thereby enhancing electrochemical performance.

51 Based on the above discussion, the electrode material demonstrates the best  
52 electrochemical performance when the molar ratio of  $\text{Zn}^{2+}$  to  $\text{Co}^{2+}$  is 2:1.

## 53 2. Optimization of the PLB addition amount

54 Similarly, masses of 0.025 g, 0.05 g, 0.10 g, and 0.15 g of PLB were separately weighed.  
 55 Under the conditions of a  $\text{Zn}^{2+}$  to  $\text{Co}^{2+}$  molar ratio of 2:1 and a carbonization temperature of  
 56 800 °C, a series of composite materials were prepared to study the influence of PLB addition  
 57 on the electrochemical performance of the electrodes, as shown in Fig. S2.

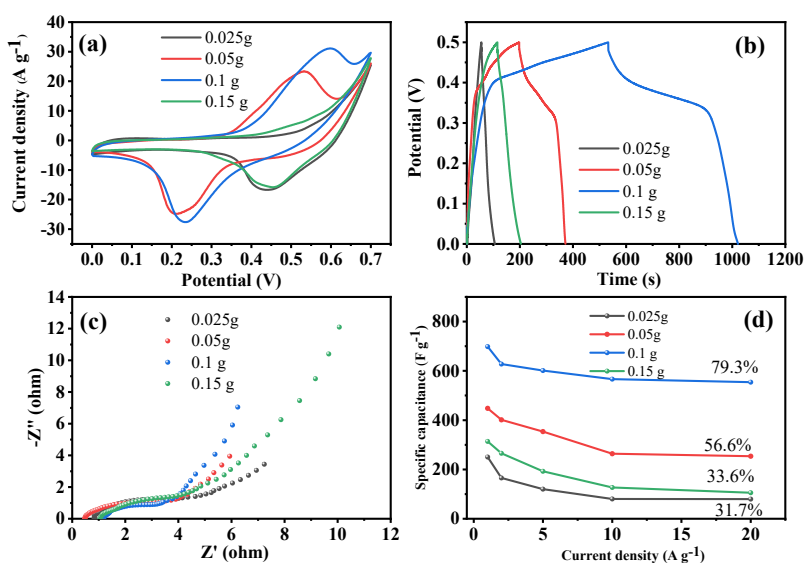

58 **Fig. S2** Electrochemical performance of electrodes with different additions of PLB.

59 (a) CV curve; (b) GCD curve; (c) EIS curve; (d) Specific capacitance

60 As shown in Fig. S2a, at a scanning rate of  $20 \text{ mV s}^{-1}$ , the CV curves for different  
 61 addition amounts show a voltage window of 0-0.7 V for the four electrodes. It can be  
 62 observed that the closed area of the CV curve is the largest when 0.1 g of PLB is used, and  
 63 there is a clear oxidation-reduction peak, demonstrating fast Faradaic reaction kinetics and  
 64 indicating good electrochemical performance. Fig. S2b presents the GCD curves for different  
 65 amounts of PLB added at a current density of  $1 \text{ A g}^{-1}$ . The GCD curves exhibit approximately  
 66 symmetrical behavior under the same current density. When 0.1 g of PLB is added, the GCD  
 67 curve shows the longest charging and discharging time, with obvious symmetry and extended  
 68

69 charge-discharge levels, indicating that an appropriate amount of PLB enhances capacitance  
70 performance.

71 The EIS curve is shown in Fig. S2c. In the high-frequency region, the intercept between  
72 the curve and the x-axis represents the internal resistance ( $R_s$ ) of the material. A smaller x-  
73 axis intercept at 0.1 g of PLB indicates the electrode material has lower internal resistance.  
74 Additionally, the semicircle radius of the curve in the high-frequency region is associated  
75 with charge transfer resistance ( $R_{ct}$ ). A smaller semicircle radius suggests faster charge  
76 transfer and stronger charge transfer capability. Therefore, the electrode material with 0.1 g of  
77 PLB has small  $R_s$  and  $R_{ct}$ . The slope of the straight line in the low-frequency region relates to  
78 diffusion resistance ( $Z_w$ ). A larger slope indicates smaller ion diffusion resistance, stronger  
79 diffusion ability in the electrolyte, and better diffusion effect. The maximum slope of the  
80 curve at 0.1 g PLB demonstrates its large diffusion ability.

81 The specific capacitance results under different current densities are shown in Fig. S2d.  
82 At 1-20 A g<sup>-1</sup>, the capacitance retention rates for different PLB masses (0.025 g, 0.05 g, 0.10 g,  
83 0.15 g) are 31.7%, 56.6%, 79.3%, and 33.6%, respectively. This indicates that the capacitance  
84 retention rate initially increases and then decreases with increasing PLB mass. When 0.10 g of  
85 PLB is used, the specific capacitance and capacitance retention rate are optimized. This may  
86 be due to the Faradaic reaction of the electrode material being affected at higher current  
87 densities, decreasing its capacitance. Excessive PLB results in uneven distribution of ZnCo  
88 MOF particles, whereas an appropriate amount of PLB provides a suitable porous structure,  
89 enhancing double-layer capacitance and reducing electrolyte ion transport distance.

Based on the above discussion, the electrode material exhibits better electrochemical performance when the PLB addition amount is 0.1 g.

### 3 Optimization of carbonization temperature

The influence of carbonization temperature on the electrochemical performance of electrodes was investigated under the conditions of a  $\text{Zn}^{2+}$  to  $\text{Co}^{2+}$  molar ratio of 2:1 and a PLB addition of 0.1 g, as shown in Fig. S3.

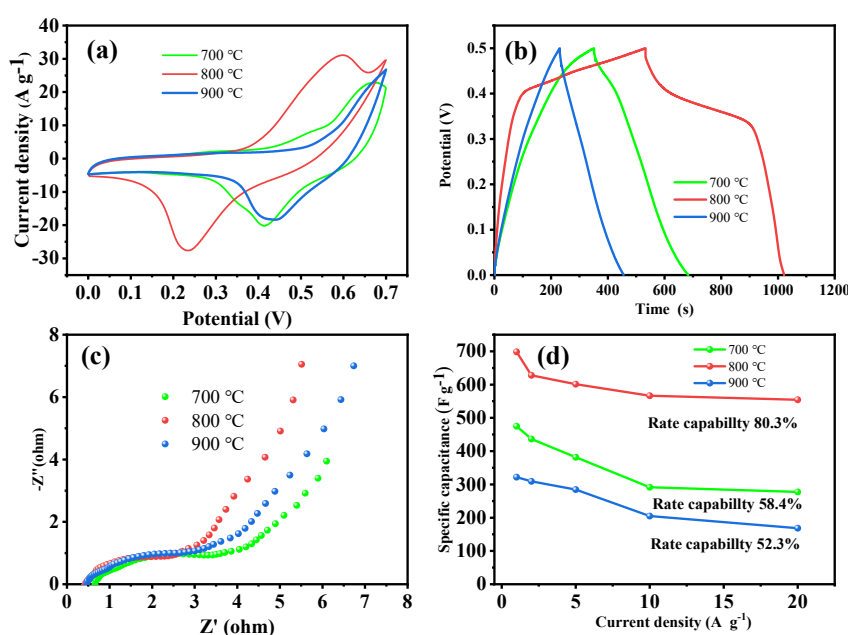

**Fig. S3** Electrochemical performance of the composites at different carbonization temperatures. (a) CV curve, (b) GCD curve, (c) EIS curve, (d) Specific capacitance diagram

Fig. S3a shows the CV curves at different carbonization temperatures at a scanning rate of  $20 \text{ mV s}^{-1}$ . It can be seen that at the same scanning rate, all CV curves exhibit redox peaks, indicating that the electrodes exhibit Faradaic behavior. As the carbonization temperature increases, the curve area first increases and then decreases. The CV curve area is largest at  $800 \text{ }^{\circ}\text{C}$ , indicating good capacitance performance. This may be due to the volatilization of Zn species at high temperatures providing active sites and enhancing chemical reaction behavior,

105 while excessive temperatures cause the collapse of the carbon framework, reducing the  
106 specific surface area and hindering electrochemical reactions.

107 As shown in Fig. S3b, at a current density of  $1 \text{ A g}^{-1}$ , the GCD curves of the material  
108 exhibit approximately symmetrical behavior at different temperatures. When the  
109 carbonization temperature is at  $800^\circ\text{C}$ , the GCD curve shows the longest charging and  
110 discharging time, with clear symmetry and a longer charging and discharging plateau, further  
111 indicating good capacitive performance, consistent with the CV curve. The EIS spectra are  
112 shown in Fig. S3c. In the high-frequency region, the electrode material carbonized at  $800^\circ\text{C}$   
113 has a smaller internal resistance and a smaller semi-circular radius, indicating fast charge  
114 transfer speed and strong charge transfer ability.

115 In the low-frequency region, the EIS curve of the electrode material carbonized at  $800^\circ\text{C}$   
116 has a steep slope, indicating lower ion diffusion resistance in the electrolyte and better  
117 diffusion effect. This facilitates rapid ion/charge transfer, thereby improving capacitive  
118 performance. According to the GCD curve, the specific capacitance of electrode materials at  
119 different carbonization temperatures is shown in Fig. S3d. At a current density of  $1\text{-}20 \text{ A g}^{-1}$ ,  
120 the electrode material carbonized at  $800^\circ\text{C}$  consistently exhibits higher specific capacitance  
121 and capacitance retention, reaching 80.3%.

122 To sum up, the optimal conditions to prepare the electrode material are as follows: a  $\text{Zn}^{2+}$   
123 to  $\text{Co}^{2+}$  molar ratio of 2:1, a PLB addition of 0.1 g, and a carbonization temperature of  $800^\circ\text{C}$ ,  
124 the material is designated as ZnCo-MOF@PLB-800.
